# Supplementary material for: Rare Tumors Causing Median Nerve Compression in Adults—A Narrative Review
Source: PubMed Central journal article supplement — Arch Plast Surg. 2022 Sep 23;49(5):656–62. doi: 10.1055/s-0042-1756345 (PMC9507571; doi:10.1055/s-0042-1756345), 2022-09-23

## Supplementary Appendix A: Electronic Search Strategy

### PubMed

1. ((median nerve compression[tiab] or carpal tunnel syndrome[tiab] or carpal tunnel syndrome[mesh] or median nerve neuropathy[tiab] or median neuropathy[tiab] or median neuropathy[mesh] or compression neuropathy [tiab] or entrapment neuropathy[tiab] or median nerve entrapment[tiab] or pronator syndrome[tiab] or anterior interosseous nerve syndrome[tiab] or proximal median nerve entrapment[tiab] or proximal median nerve compression [tiab]) and (rare[tiab] or unique[tiab] or uncommon[tiab] or unfrequent\*[tiab] or unusual[tiab] or infrequent\*[tiab] or less common[tiab]) and (causality [mesh] or “carpal tunnel syndrome/etiology”[mesh:noexp] or “median neuropathy/etiology”[mesh:noexp] or pathogenesis[tiab] or causes[tiab] or caus\*[tiab] or cases[tiab] or case[ti]))
2. Publication date from 2000

### Embase

1. ((exp carpal tunnel syndrome/ or (Median nerve compression or carpal tunnel syndrome or median nerve neuropathy or median neuropathy or compression neuropathy or entrapment neuropathy or median nerve entrapment or pronator syndrome or anterior interosseous nerve syndrome).ti,ab,kw.) and (rare or unique or

uncommon or unfrequent or unusual or infrequent or less common).ti,ab,kw. and (causality/ or carpal tunnel syndrome/et or (pathogenesis or causes or caus\* or cases).ti,ab,kw. or case.ti.))

2. limit 1 to conference abstract status
3. 1 NOT 2
4. Publication year from 2000

### Web of Science

1. (AB=(median nerve compression or carpal tunnel syndrome or median nerve neuropathy or median neuropathy or compression neuropathy or entrapment neuropathy or median nerve entrapment or pronator syndrome or anterior interosseous nerve syndrome or proximal median nerve entrapment or proximal median nerve compression)) AND LANGUAGE: (English) AND DOCUMENT TYPES: (Article OR Abstract of Published Item)
2. (AB=(rare or unique or uncommon or unfrequent\* or unusual\* or infrequent\* or less common\*)) AND LANGUAGE: (English) AND DOCUMENT TYPES: (Article OR Abstract of Published Item)
3. (AB=(causality or etiology or pathogenesis or causes or caus\* or case\*)) AND LANGUAGE: (English) AND DOCUMENT TYPES: (Article OR Abstract of Published Item)
4. #1 and #2 and #3, timespan 2000–2020

**Supplementary Appendix B: Flow Diagram of the Study Selection Process**

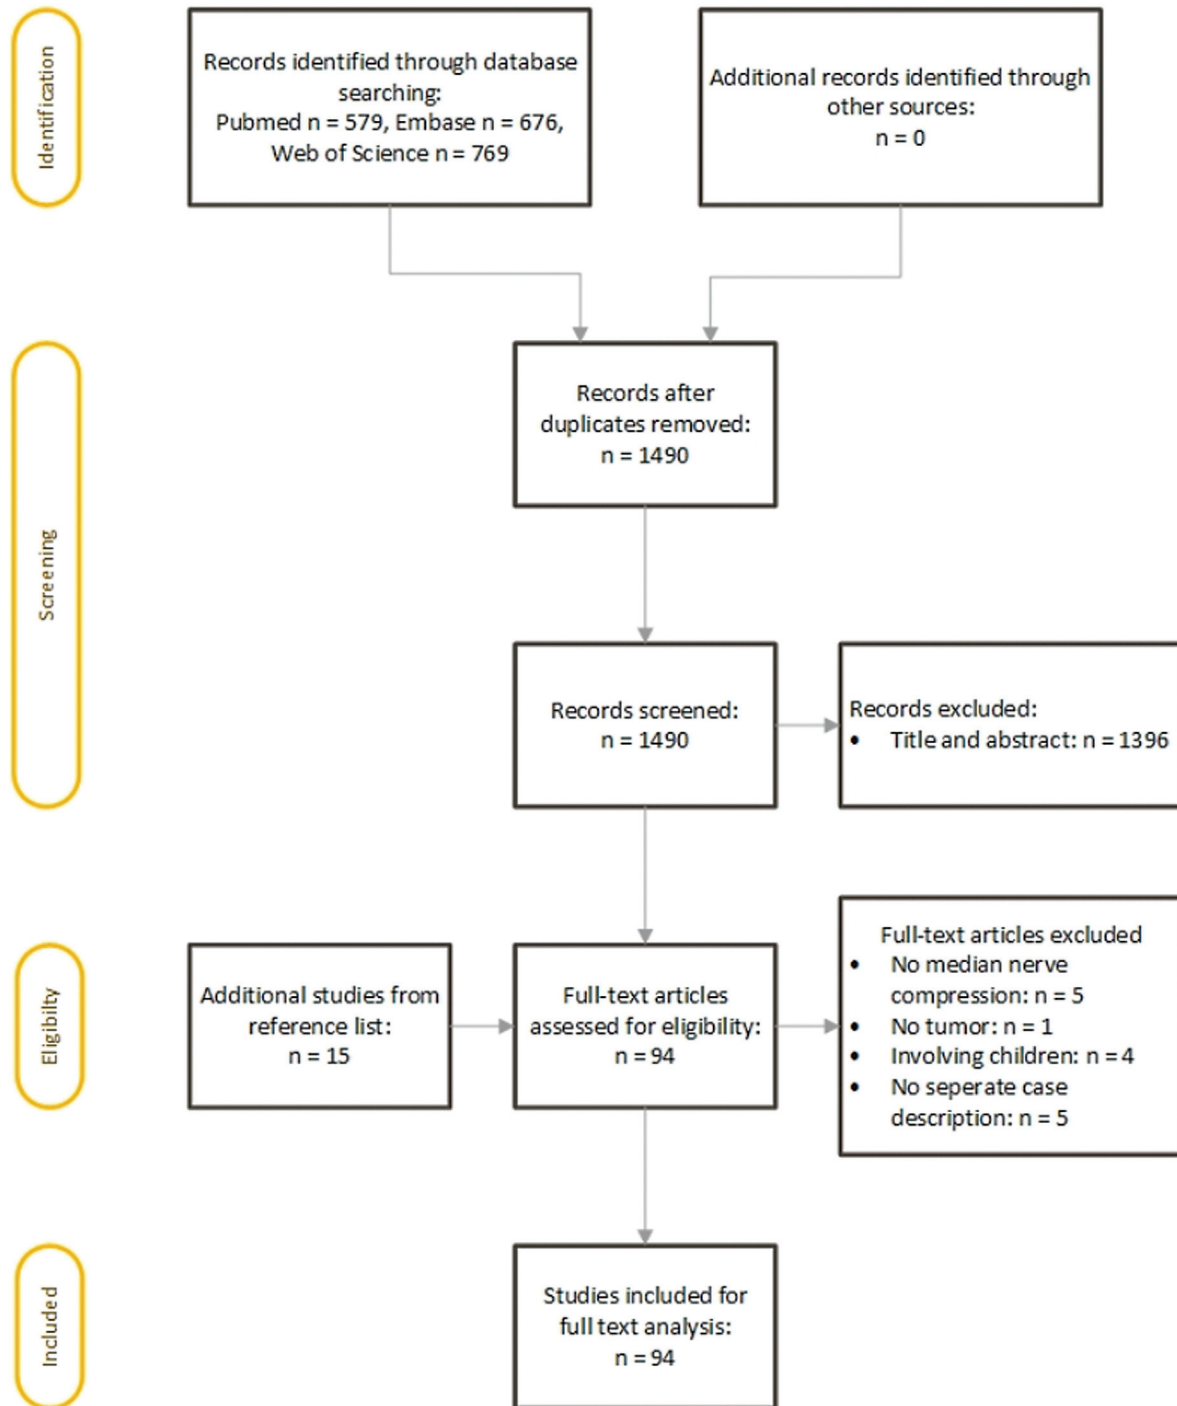

Supplement: 10-1055-s-0042-1756345-saps-21128.pdf [file 10-1055-s-0042-1756345-saps-21128.pdf]
